# Supplementary material for: A Lipidomics- and Transcriptomics-Based Analysis of the Intestine of Genetically Obese (ob/ob) and Diabetic (db/db) Mice: Links with Inflammation and Gut Microbiota
Source: MDPI journal article supplement (doi:10.3390/cells12030411), 2023-01-25
Supplement: s1 [file s1]

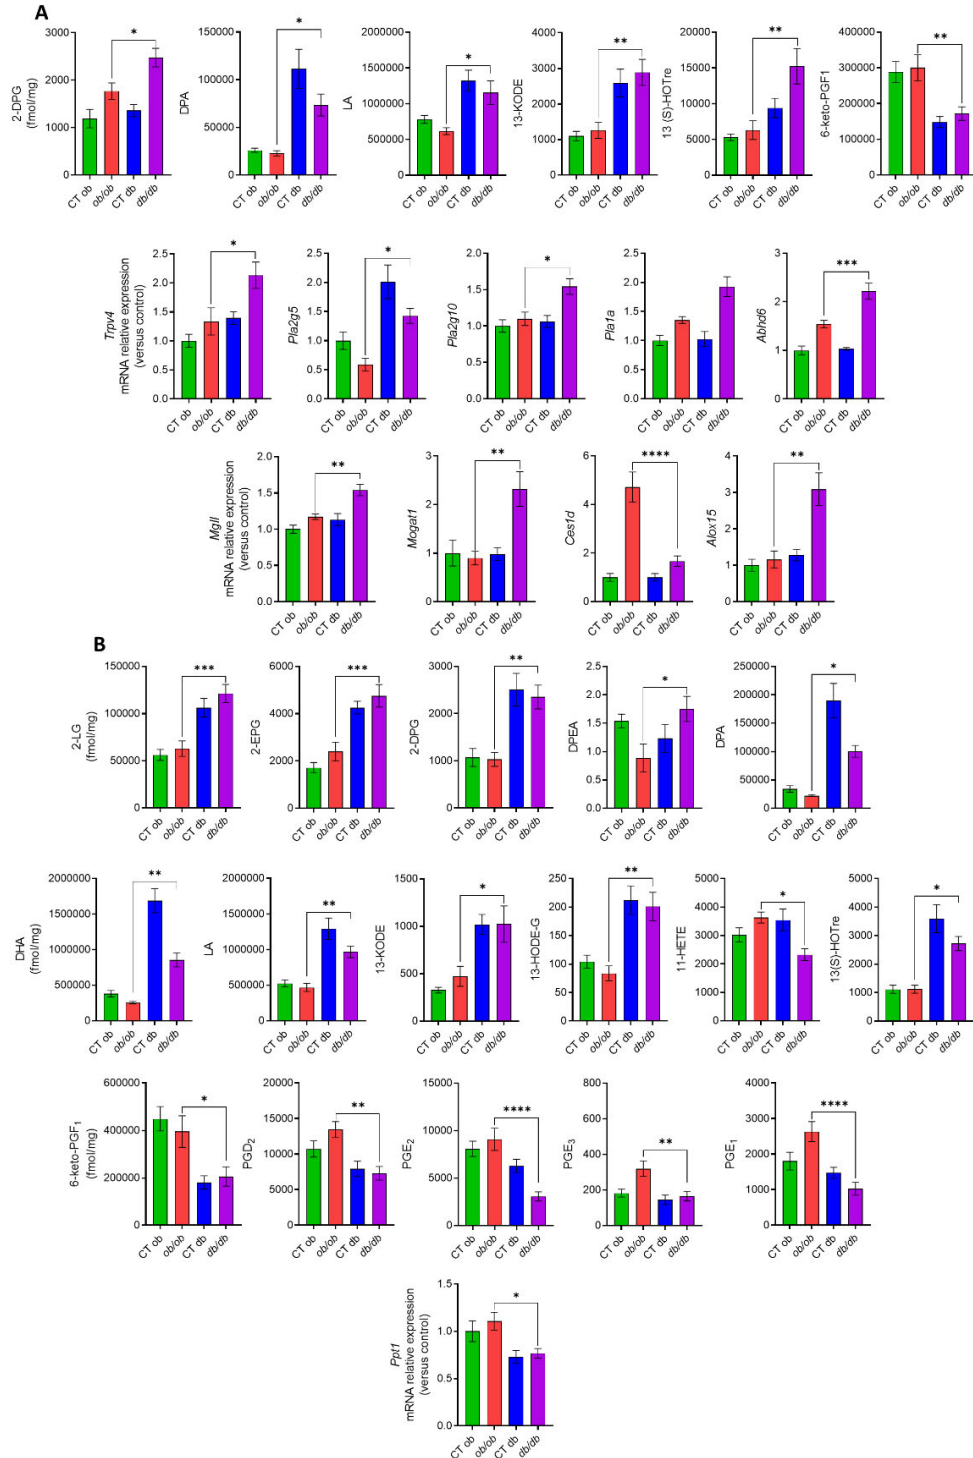

**Supplementary Figure S1.** Different eCBome tone in the jejunum and the ileum of ob/ob and db/db mice. **(A)** Concentrations of the eCBome-related mediators in the jejunum and ileum, respectively (fmol/mg wet tissue weight), measured by HPLC-MS/MS. **(B)** mRNA expression of receptors and metabolic enzymes for 2-monoacylglycerols and N-acylethanolamines in the jejunum and the ileum, respectively, measured by qPCR-based TaqMan Open Array. Data are presented as the mean  $\pm$  S.E.M of  $n=7-10$ . \*  $P \leq 0.05$ , \*\*  $P \leq 0.01$ , \*\*\*  $P \leq 0.005$ , \*\*\*\*  $P \leq 0.001$ . For mRNA expression, relative units were calculated versus the mean of the CT ob mice values set at 1. Data were analyzed by one-way ANOVA followed by Tukey's post hoc test. Abbreviations: see supplementary Table S1 and Table S2.

**Supplementary Table S1.** Endocannabinoid and related lipid mediator abbreviations.

| <b>Symbol</b>          | <b>Endocannabinoids name</b>                 |
|------------------------|----------------------------------------------|
| <b>2-AG</b>            | 1(3)- and 2-arachidonoyl-glycerol            |
| <b>AEA</b>             | <i>N</i> -arachidonoyl-ethanolamine          |
| <b>DHEA</b>            | <i>N</i> -docosahexanoyl-ethanolamine        |
| <b>2-DHG</b>           | 1(3)- and 2-docosahexaenoyl-glycerol         |
| <b>DPA</b>             | docosapentaenoic acid (n-3)                  |
| <b>2-DPG</b>           | 1(3)- and 2-docospentaenoyl-glycerol (n-3)   |
| <b>EPEA</b>            | <i>N</i> -eicosapentanoyl-ethanolamine       |
| <b>EPA</b>             | eicosapentaenoic acid                        |
| <b>2-EPG</b>           | 2-eicosapentaenoyl-glycerol                  |
| <b>15-HEPE</b>         | 15-hydroxyeicosapentaenoic acid              |
| <b>18-HEPE</b>         | 18-hydroxyeicosapentaenoic acid              |
| <b>13-HODE</b>         | 13-hydroxyoctadecadienoic acid               |
| <b>13-HODE-G</b>       | 13-hydroxyoctadecadienoyl-glycerol           |
| <b>11-HETE</b>         | 11-hydroxyeicosatetraenoic acid              |
| <b>13(S)-HOTre</b>     | 13S-hydroxy-9Z,11E,15Z-octadecatrienoic acid |
| <b>12-HEPE</b>         | 12-hydroxyeicosapentaenoic acid              |
| <b>15-HEPE</b>         | 15-hydroxyeicosapentaenoic acid              |
| <b>14-HDHA</b>         | 14-hydroxydocosahexaenoic acid               |
| <b>17-HDHA</b>         | 14-hydroxydocosahexaenoic acid               |
| <b>LA</b>              | Linoleic acid                                |
| <b>LEA</b>             | <i>N</i> -linoleoyl-ethanolamine             |
| <b>2-LG</b>            | 1(3)- and 2-linoleoyl-glycerol               |
| <b>SEA</b>             | <i>N</i> -stearoyl-ethanolamine              |
| <b>OEA</b>             | <i>N</i> -oleoyl-ethanolamine                |
| <b>2-OG</b>            | 1(3)- and 2-oleoyl-glycerol                  |
| <b>PEA</b>             | <i>N</i> -palmitoyl-ethanolamine             |
| <b>2-PG</b>            | 2-palmitoyl-glycerol                         |
| <b>NAGly</b>           | <i>N</i> -arachidonoyl glycine               |
| <b>PGD<sub>2</sub></b> | Prostaglandin D <sub>2</sub>                 |
| <b>PGE<sub>2</sub></b> | Prostaglandin E <sub>2</sub>                 |

**Supplementary Table S2.** List of the genes analyzed by qPCR based TaqMan Open Array and their function.

| <b>Gene symbol</b> | <b>Gene name</b>                                                     | <b>Function</b>                                                                                           |
|--------------------|----------------------------------------------------------------------|-----------------------------------------------------------------------------------------------------------|
| <i>Cacna1b</i>     | calcium channel, voltage-dependent, T type, alpha 1B subunit         | receptor                                                                                                  |
| <i>Cacna1h</i>     | calcium channel, voltage-dependent, T type, alpha 1H subunit         | receptor                                                                                                  |
| <i>Cnr1</i>        | cannabinoid receptor 1                                               | receptor                                                                                                  |
| <i>Cnr2</i>        | cannabinoid receptor 2                                               | receptor                                                                                                  |
| <i>Gpr119</i>      | G protein-coupled receptor 119                                       | receptor                                                                                                  |
| <i>Gpr18</i>       | G protein-coupled receptor 18                                        | receptor                                                                                                  |
| <i>Gpr55</i>       | G protein-coupled receptor 55                                        | receptor                                                                                                  |
| <i>Ppara</i>       | peroxisome proliferator activated receptor alpha                     | receptor                                                                                                  |
| <i>Pparg</i>       | peroxisome proliferator activated receptor gamma                     | receptor                                                                                                  |
| <i>Ptgfr</i>       | prostaglandin F receptor                                             | receptor                                                                                                  |
| <i>Trpv1</i>       | transient receptor potential cation channel, subfamily V, member 1   | ligand-activated channel                                                                                  |
| <i>Trpv2</i>       | transient receptor potential cation channel, subfamily V, member 2   | ligand-activated channel                                                                                  |
| <i>Trpv4</i>       | transient receptor potential cation channel, subfamily V, member 4   | ligand-activated channel                                                                                  |
| <i>Abhd4</i>       | abhydrolase domain containing 4                                      | anabolic enzyme for NAEs                                                                                  |
| <i>Akr1b3</i>      | aldo-keto reductase family 1, member B3 (aldose reductase)           | anabolic enzyme for prostamides, catabolic enzyme for AEA and 2-AG                                        |
| <i>Fam213b</i>     | family with sequence similarity 213, member B                        | anabolic enzyme for prostamides, catabolic enzyme for AEA and 2-AG                                        |
| <i>Gde1</i>        | glycerophosphodiester phosphodiesterase 1                            | anabolic enzyme for NAEs                                                                                  |
| <i>Gdpd1</i>       | glycerophosphodiester phosphodiesterase domain containing 1          | anabolic enzyme for NAEs                                                                                  |
| <i>Hrasls5</i>     | HRAS-like suppressor family, member 5                                | anabolic enzyme for NAEs                                                                                  |
| <i>Inpp5d</i>      | inositol polyphosphate-5-phosphatase D                               | anabolic enzyme for NAEs                                                                                  |
| <i>Napepld</i>     | N-acyl phosphatidylethanolamine-specific phospholipase D-like enzyme | anabolic enzyme for NAEs                                                                                  |
| <i>Pla2g5</i>      | phospholipase A2, group V                                            | AA-releasing enzyme possibly involved in phospholipid remodeling and hence biosynthesis of eCB precursors |
| <i>Ptgs2</i>       | prostaglandin-endoperoxide synthase 2                                | anabolic enzyme for prostamides, catabolic enzyme for AEA and 2-AG                                        |
| <i>Ptpn22</i>      | protein tyrosine phosphatase, non-receptor type 22 (lymphoid)        | anabolic enzyme for AEA                                                                                   |
| <i>Ptges</i>       | prostaglandin E synthase                                             | anabolic enzyme for prostamides, catabolic enzyme for AEA and 2-AG                                        |
| <i>Comt</i>        | catechol-O-methyltransferase                                         | catabolic enzyme for N-acyl-dopamines                                                                     |
| <i>Faah</i>        | fatty acid amide hydrolase                                           | catabolic enzyme for NAEs, primary fatty acid amides, N-acyl-taurines and N-acyl-glycines                 |
| <i>Naaa</i>        | N-acylethanolamine acid amidase                                      | catabolic enzyme for saturated NAEs                                                                       |
| <i>Pam</i>         | peptidylglycine alpha-amidating monooxygenase                        | anabolic enzyme for primary fatty acid amides, catabolic enzyme for N-acyl-glycines                       |
| <i>Dagla</i>       | diacylglycerol lipase, alpha                                         | anabolic enzyme for 2-acylglycerols                                                                       |

|                           |                                                    |                                               |
|---------------------------|----------------------------------------------------|-----------------------------------------------|
| <b><i>Daglb</i></b>       | diacylglycerol lipase, beta                        | anabolic enzyme for 2-acylglycerols           |
| <b><i>Dgke</i></b>        | diacylglycerol kinase, epsilon                     | anabolic/catabolic enzyme for 2-acylglycerols |
| <b><i>Enpp2</i></b>       | ectonucleotide pyrophosphatase/phosphodiesterase 2 | autotaxin- a LysoPLD: produces LPA.           |
| <b><i>Pla1a</i></b>       | phospholipase A1 member A                          | anabolic enzyme for 2-acylglycerols           |
| <b><i>Plcb1</i></b>       | phospholipase C, beta 1                            | anabolic enzyme for 2-acylglycerols           |
| <b><i>Abhd12</i></b>      | abhydrolase domain containing 12                   | catabolic enzyme for monacylglycerols         |
| <b><i>Abhd16a</i></b>     | abhydrolase domain containing 16                   | catabolic enzyme for monacylglycerols         |
| <b><i>Abhd6</i></b>       | abhydrolase domain containing 6                    | catabolic enzyme for monacylglycerols         |
| <b><i>Agk</i></b>         | acylglycerol kinase                                | catabolic enzyme for monacylglycerols         |
| <b><i>Alox12</i></b>      | arachidonate 12-lipoxygenase                       | catabolic enzyme for AEA and 2-AG             |
| <b><i>Alox15</i></b>      | arachidonate 15-lipoxygenase                       | catabolic enzyme for AEA and 2-AG             |
| <b><i>Ces1d</i></b>       | carboxylesterase 1D                                | catabolic enzyme for monoacylglycerols        |
| <b><i>Ces2h</i></b>       | carboxylesterase 2H                                | catabolic enzyme for monoacylglycerols        |
| <b><i>Mgl1 (Magl)</i></b> | monoglyceride lipase                               | catabolic enzyme for monoacylglycerols        |
| <b><i>Mogat1</i></b>      | monoacylglycerol O-acyltransferase 1               | catabolic enzyme for monoacylglycerols        |
| <b><i>Ppt1</i></b>        | palmitoyl-protein thioesterase 1                   | catabolic enzyme for 2-AG                     |
| <b><i>Gapdh</i></b>       | glyceraldehyde-3-phosphate dehydrogenase           | reference gene                                |
| <b><i>Hprt</i></b>        | hypoxanthine guanine phosphoribosyl transferase    | reference gene                                |
| <b><i>Rps13</i></b>       | ribosomal protein S13                              | reference gene                                |
| <b><i>Tbp</i></b>         | TATA box binding protein                           | reference gene                                |

**Supplementary Table S3.** qPCR primer sequences for the targeted mouse genes.

| Gene symbol   | Gene name                        | Forward Primer sequence (5'-3') | Reverse Primer sequence (5'-3') |
|---------------|----------------------------------|---------------------------------|---------------------------------|
| <i>Rorgt2</i> | Retinoid orphan receptor gamma t | GAAATGTTGTTGACCCCTCT            | TCATACCCAAACCCCATAAAC           |
| <i>Il17a</i>  | Interleukin 17a                  | AAGGCCCTCAGACTACCTCAA           | TTCCCAGATCACAGAGGGATATCTA       |
| <i>Rpl19</i>  | Ribosomal Protein L19            | GAAGGTCAAAGGGAATGTGTTCA         | CCTTGTCTGCCTTCAGCTTGT           |
